# Supplementary material
Source: PubMed Central journal article supplement (PMC7246153)
Supplement: NIHMS1544521-supplement-12028_2019_871_MOESM1_ESM.pdf [file NIHMS1544521-supplement-12028_2019_871_MOESM1_ESM.pdf]

|               | Human        |          |             |          |           |              | Mouse  |          |       |          |           |              |
|---------------|--------------|----------|-------------|----------|-----------|--------------|--------|----------|-------|----------|-----------|--------------|
|               | Good Outcome |          | Bad Outcome |          | Direction | Significance | Sham   |          | SAH   |          | Direction | Significance |
|               | Mean         | St Error | Mean        | St Error |           |              | Mean   | St Error | Mean  | St Error |           |              |
| IL-1 $\alpha$ | 2.538        | 0.2669   | 5.476       | 1.161    | Increased | S            | 0.009  | 0.003    | 0.026 | 0.007    | Increased | NS           |
| IL-1 $\beta$  | 0.6275       | 0.199    | 1.866       | 0.887    | Increased | NS           | 0.008  | 0.004    | 0.012 | 0.003    | Increased | NS           |
| IL-1ra        | 5.021        | 1.305    | 12.61       | 3.868    | Increased | NS           | 0.011  | 0.006    | 0.013 | 0.003    | Increased | NS           |
| IL-2          | 2.609        | 0.8067   | 6.923       | 1.644    | Increased | S            | 0.004  | 0.002    | 0.009 | 0.001    | Increased | S            |
| IL-4          | -0.422       | 0.315    | -0.1897     | 1.034    | Increased | NS           | 0.009  | 0.003    | 0.006 | 0.001    | Decreased | NS           |
| IL-5          | 0.153        | 0.347    | 1.161       | 1.648    | Increased | NS           | 0.004  | 0.001    | 0.008 | 0.003    | Increased | NS           |
| IL-6          | 3.917        | 1.639    | 8.718       | 4.761    | Increased | NS           | 0.003  | 0.001    | 0.006 | 0.002    | Increased | NS           |
| IL-10         | 1.001        | 0.001    | 1.002       | 0.001    | Unchanged | NS           | 0.007  | 0.003    | 0.056 | 0.041    | Increased | NS           |
| IL-12 p70     | 3.4          | 0.517    | 7.071       | 2.018    | Increased | NS           | 0.007  | 0.003    | 0.023 | 0.011    | Increased | NS           |
| IL-13         | 3.319        | 0.589    | 7.358       | 3.323    | Increased | NS           | 0.002  | 0.001    | 0.011 | 0.004    | Increased | NS           |
| IL-16         | 4.67         | 0.998    | 9.959       | 2.669    | Increased | NS           | 0.008  | 0.005    | 0.018 | 0.004    | Increased | NS           |
| IL-17         | 1.273        | 0.642    | 5.307       | 1.889    | Increased | S            | 0.003  | 0.003    | 0.018 | 0.005    | Increased | S            |
| IL-23         | 2.408        | 0.421    | 7.238       | 3.83     | Increased | NS           | 0.010  | 0.004    | 0.013 | 0.003    | Increased | NS           |
| IL-27         | 0.203        | 0.1472   | 2.115       | 2.481    | Increased | NS           | 0.037  | 0.026    | 0.034 | 0.008    | Decreased | NS           |
| CCL2          | 20.35        | 11.23    | 30.11       | 13.8     | Increased | NS           | 0.012  | 0.006    | 0.018 | 0.007    | Increased | NS           |
| CCL3          | 2.624        | 0.603    | 6.689       | 2.811    | Increased | NS           | 0.010  | 0.004    | 0.020 | 0.007    | Increased | NS           |
| CCL4          | 1.857        | 0.441    | 5.227       | 2.606    | Increased | NS           | 0.008  | 0.003    | 0.012 | 0.003    | Increased | NS           |
| CCL5          | 1.94         | 0.286    | 1.883       | 0.489    | Decreased | NS           | -0.002 | 0.005    | 0.009 | 0.003    | Increased | NS           |
| CXCL1/IL-8    | 1.655        | 0.504    | 8.838       | 3.917    | Increased | NS           | 0.005  | 0.001    | 0.008 | 0.003    | Increased | NS           |
| CXCL10        | 4.08         | 0.833    | 9.917       | 3.492    | Increased | NS           | 0.009  | 0.003    | 0.009 | 0.002    | No change | NS           |
| CXCL11        | 2.243        | 0.341    | 4.552       | 1.51     | Increased | NS           | 0.008  | 0.002    | 0.013 | 0.006    | Increased | NS           |
| CXCL12        | 1.933        | 0.506    | 3.179       | 0.602    | Increased | NS           | 0.020  | 0.003    | 0.041 | 0.014    | Increased | NS           |
| C5/C5a        | 4.805        | 4.516    | 0.797       | 0.246    | Decreased | NS           | 0.011  | 0.004    | 0.015 | 0.004    | Increased | NS           |
| G-CSF         | 0.93         | 0.125    | 2.499       | 1.677    | Increased | NS           | 0.007  | 0.002    | 0.012 | 0.004    | Increased | NS           |
| GM-CSF        | 12.52        | 7.974    | 12.12       | 3.173    | Decreased | NS           | 0.009  | 0.004    | 0.012 | 0.004    | Increased | NS           |
| IFN- $\gamma$ | 1.911        | 0.523    | 7.386       | 2.954    | Increased | NS           | 0.009  | 0.003    | 0.015 | 0.004    | Increased | NS           |
| s-ICAM        | 17.79        | 11.79    | 23.99       | 14.34    | Increased | NS           | 0.192  | 0.072    | 0.296 | 0.104    | Increased | NS           |
| TNF- $\alpha$ | 6.884        | 1.441    | 14.89       | 3.653    | Increased | S            | 0.014  | 0.004    | 0.020 | 0.006    | Increased | NS           |
| TREM-1        | 3.749        | 0.636    | 8.302       | 2.272    | Increased | S            | 0.007  | 0.003    | 0.011 | 0.004    | Increased | NS           |
| IL-3          | -            | -        | -           | -        | -         | -            | 0.007  | 0.002    | 0.005 | 0.002    | Decreased | NS           |

|                 |       |       |       |       |           |    |       |       |       |       |           |    |
|-----------------|-------|-------|-------|-------|-----------|----|-------|-------|-------|-------|-----------|----|
| <b>IL-7</b>     | -     | -     | -     | -     | -         | -  | 0.011 | 0.006 | 0.024 | 0.012 | Increased | NS |
| <b>IL-17E</b>   | 1.566 | 0.542 | 6.224 | 3.848 | Increased | NS | -     | -     | -     | -     | -         | -  |
| <b>IL-32a</b>   | 1.288 | 0.143 | 1.15  | 0.261 | Decreased | NS | -     | -     | -     | -     | -         | -  |
| <b>CCL11</b>    | 2.243 | 0.341 | 4.552 | 1.151 | Increased | NS | 0.004 | 0.001 | 0.014 | 0.005 | Increased | NS |
| <b>CCL12</b>    | -     | -     | -     | -     | -         | -  | 0.013 | 0.005 | 0.001 | 0.007 | Decreased | NS |
| <b>CCL17</b>    | -     | -     | -     | -     | -         | -  | 0.002 | 0.001 | 0.010 | 0.004 | Increased | NS |
| <b>CXCL2</b>    | -     | -     | -     | -     | -         | -  | 0.001 | 0.003 | 0.014 | 0.004 | Increased | S  |
| <b>CXCL9</b>    | -     | -     | -     | -     | -         | -  | 0.011 | 0.004 | 0.018 | 0.007 | Increased | NS |
| <b>CXCL13</b>   | -     | -     | -     | -     | -         | -  | 0.011 | 0.003 | 0.010 | 0.002 | No change | NS |
| <b>CD40L</b>    | 1.638 | 0.331 | 3.662 | 1.215 | Increased | NS | -     | -     | -     | -     | -         | -  |
| <b>MIF</b>      | 30.78 | 16.05 | 66.16 | 19.04 | Increased | NS | -     | -     | -     | -     | -         | -  |
| <b>M-CSF</b>    | -     | -     | -     | -     | -         | -  | 0.060 | 0.034 | 0.089 | 0.044 | Increased | NS |
| <b>SerpinE1</b> | 56.08 | 20.04 | 57.56 | 17.15 | Increased | NS | -     | -     | -     | -     | -         | -  |
| <b>TIMP-1</b>   | -     | -     | -     | -     | -         | -  | 0.008 | 0.004 | 0.012 | 0.003 | Increased | NS |

**Supplemental Table 1:** Mean and Standard error values for analytes tested. Each individual point was normalized against local peri-dot signal intensity to limit intra-membrane differences, then subtracted from the mean of the two normalized negative control dots. The intensity of the signal does not correlate with level of cytokine and is only valid as a comparison between good and poor outcome (humans) and sham and SAH (mouse). Direction of change is a simple comparison of the two groups and significance was defined by a p value of 0.05 on Student's T test.

# A Brain

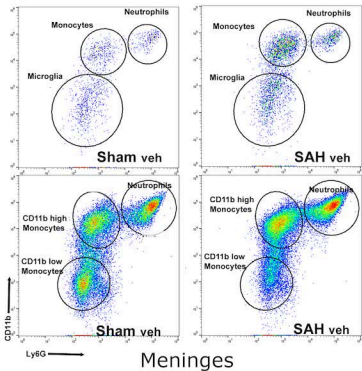

# B

## BRAIN

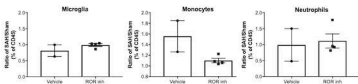

## MENINGES

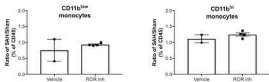

**Supplemental Figure 1: A) Flow cytometric analysis of brain and meninges of mice three days after SAH shows that there are more inflammatory cells in the meninges than in the brain.** Single cell suspensions of brain parenchyma showed that there are three predominant myeloid cell types after SAH: microglia (CD45<sup>+</sup>Ly6C<sup>+</sup>Ly6G<sup>low</sup>CD11b<sup>low</sup>), monocytes (CD45<sup>+</sup>Ly6C<sup>high</sup>Ly6G<sup>int</sup>CD11b<sup>high</sup>), and neutrophils (CD45<sup>+</sup>Ly6C<sup>low</sup>Ly6G<sup>high</sup>CD11b<sup>high</sup>) in the brain (top) and neutrophils (CD45<sup>+</sup>Ly6C<sup>low</sup>Ly6G<sup>high</sup>CD11b<sup>high</sup>), and two types of monocytes (CD11b low (CD45<sup>+</sup>Ly6C<sup>high</sup>Ly6G<sup>int</sup>CD11b<sup>low</sup>) and CD11b high ((CD45<sup>+</sup>Ly6C<sup>high</sup>Ly6G<sup>int</sup>CD11b<sup>high</sup>)), in the meninges (bottom). There are more inflammatory cells in the meninges than the brain (meninges images also presented in Figure 2). **B) Inhibition of IL-17 with the ROR $\gamma$ t reverse agonist GSK805 (ROR inh) showed no difference in neutrophils or microglia in the brain<sup>4</sup>.** There was decrease in monocytes three days after SAH in the brain. In the meninges, there was no change in either population of monocytes. The bars on the graphs show the ratio of cell type (as a percentage of all inflammatory cells) between Sham and SAH animal in both vehicle-treated and ROR $\gamma$ t inhibitor treated mice.
